# Supplementary material for: Isolation and Genotyping of Adenoviruses from Wastewater and Diarrheal Samples in Egypt from 2016 to 2020
Source: MDPI journal article supplement (doi:10.3390/v14102192), 2022-10-04
Supplement: s1 [file s1]

# Isolation and Genotyping of Adenoviruses from Wastewater and Diarrheal Samples in Egypt from 2016 to 2020

Abdou Kamal Allayeh<sup>1,\*</sup>, Sahar Abd Al-Daim<sup>1</sup>, Nehal Ahmed<sup>1</sup>, Mona El-Gayar<sup>2</sup> and Ahmed Mostafa<sup>3,\*</sup>

<sup>1</sup> Virology Lab 176, Water Pollution Research Department, Environment and Climate Change Institute, National Research Centre, Dokki, Giza 12622, Egypt

<sup>2</sup> Microbiology Department, Faculty of Pharmacy, Ain Shams University, El-Qobba Bridge, El Weili 11566, Egypt

<sup>3</sup> Center of Scientific Excellence for Influenza Viruses, National Research Centre, Dokki, Giza 12622, Egypt

\* Correspondence: drallayeh@yahoo.com (A.A.); ahmed\_elsayed@daad-alumni.de (A.M.)

Supplementary Figure S1

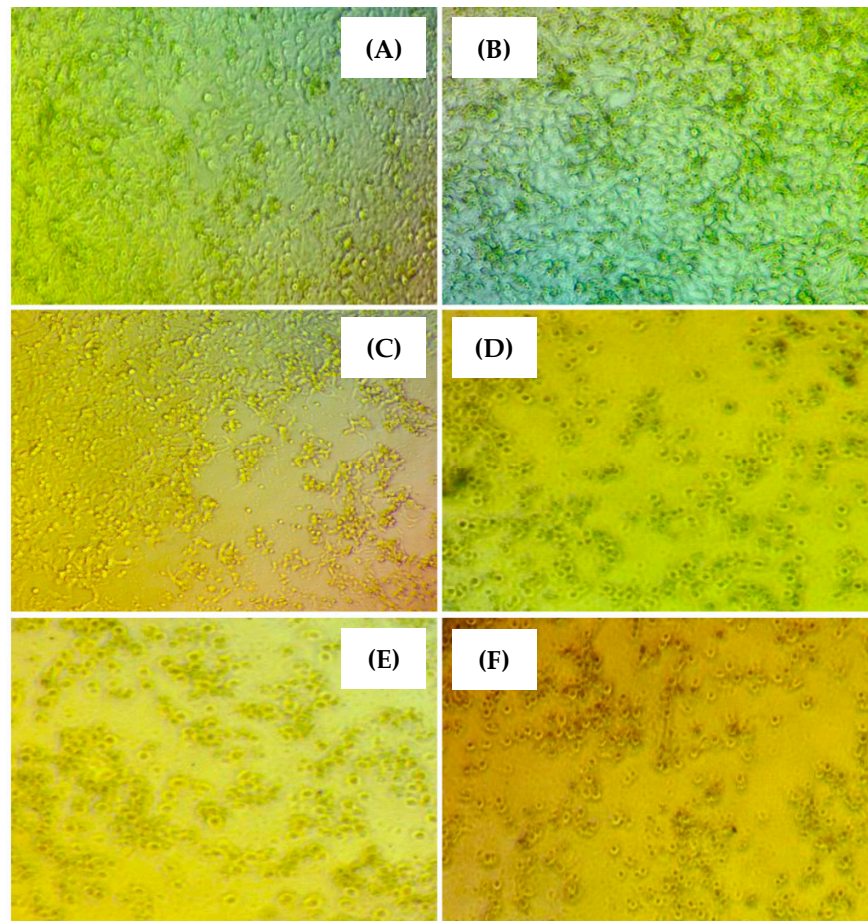

**Figure S1.** Development of Cytopathic Effect on Hep-2 Cell line during isolation of Adenoviruses; (A,B) Control HEp-2 cell line after 4 days of propagation; (C) Infected Hep-2 by positive sample of Adenovirus showing partial CPE; (D–F) Infected Hep-2 cells by positive samples of Adenovirus showing complete CPE.
